# Supplementary material for: Selective TRK Inhibitor CH7057288 against TRK Fusion-Driven Cancer
Source: Oxford University Press journal article supplement (doi:10.1158/1535-7163.mct-17-1180), 2018-09-21
Supplement: 15357163mct171180-sup-193138_3_supp_4946891_pd31p4.xlsx [file 15357163mct171180-sup-193138_3_supp_4946891_pd31p4.xlsx]

## Sheet: Sheet1
Supplementary Table S1. Cell line information and sensitivity to CH7057288 in high-throughput assay systems.
Cell line	Provider	Date obtained	CH7057288 IC50 (μM)	Note
MO-91	Hokkaido University	2014-06-25	0.00202	TRK-fusion positive
KM-12	NCI	2001-02-16	0.00508	TRK-fusion positive
KM12-Luc	JCRB	2013-11-19	0.01085	TRK-fusion positive
KMS-26	JCRB	2008-10-15	0.10558
SK-ES-1	ATCC	2002-05-08	0.10602
CUTO-3.29	University of Colorado	2015-11-10	0.19048	TRK-fusion positive
SJCRH30	ATCC	2008-08-27	0.28157
HepG2	ATCC	2004-09-01	0.36207
KARPAS-299	DSMZ	2007-10-11	0.47745
KYSE-150	DSMZ	2007-11-27	0.49715
5637	ATCC	2007-12-07	0.51983
A375	ATCC	2001-05-22	0.55349
WiDr	ATCC	1986-04-08	0.61341
MDA-MB-435S	ATCC	1994-07-20	0.69671
Hep 3B	ATCC	2004-06-22	0.79406
Huh-7	JCRB	2015-01-15	0.8684
NCI-H1155	ATCC	2008-10-30	0.93327
HEL 92.1.7	ATCC	2011-10-11	0.99997
CEM/C2	ATCC	2001-11-30	1.02299
T98G	ATCC	2000-09-12	1.03018
NCI-H1666	ATCC	2008-02-13	1.08329
LCLC-103H	DSMZ	2007-11-27	1.11037
UM-UC-14	ECACC	2010-02-05	1.1659
143B	ATCC	2009-01-21	1.17782
TCCSUP	ATCC	2007-08-24	1.17946
NCI-H929	DSMZ	2007-11-27	1.22047
NB-4	DSMZ	2008-10-23	1.27309
NCI-H526	ATCC	2005-09-28	1.30873
HCT-15	ATCC	2000-06-20	1.40294
Capan-2	ATCC	2000-10-06	1.47895
J82	ATCC	2009-03-04	1.48965
NUGC-4	JCRB	2008-09-17	1.52096
HPAC	ATCC	2008-01-16	1.59093
KMS-28BM	JCRB	2008-10-15	1.66611
PC-6	IBL	2001-07-17	1.70231
NCCIT	ATCC	2009-12-16	1.72295
RL95-2	ATCC	2009-12-16	1.72446
MV-4-11	ATCC	2005-03-09	1.76411
NCI-H1048	ATCC	2008-09-10	1.79384
NCI-H2171	ATCC	2009-05-27	1.8937
HT-1376	ATCC	1989-06-01	1.93706
NCI-H82	ATCC	2009-10-07	1.93816
SW579	ATCC	2007-08-22	1.95734
NCI-H1299	ATCC	2008-02-06	1.98102
CMK-11-5	JCRB	2005-12-21	2.02184
NCI-H2227	ATCC	2008-02-13	2.02722
KMS-11	JCRB	2008-09-03	2.05498
647-V	DSMZ	2008-04-10	2.0677
DU 145	ATCC	2000-06-22	2.07776
SK-N-SH	ATCC	2008-05-21	2.08783
IMR-32	ATCC	2008-01-16	2.09127
HCC827	ATCC	2006-03-15	2.10607
SW948	ATCC	2008-07-16	2.12756
L-363	DSMZ	2007-11-15	2.20727
LN-18	ATCC	2008-02-13	2.20769
HT-1080	ATCC	2002-11-11	2.21959
U-937	ATCC	2000-07-19	2.2315
SNU-1	ATCC	2000-01-12	2.27275
KG-1a	ATCC	1999-06-22	2.31553
HSC-39	IBL	2010-06-14	2.34315
KYSE70	JCRB	2010-02-17	2.39332
NCI-H226	ATCC	2001-02-21	2.57981
NCI-H1568	ATCC	2010-02-25	2.58485
NCI-H2081	ATCC	2008-08-20	2.70906
NCI-H1755	ATCC	2007-11-05	2.72641
SCH	JCRB	2004-05-19	2.78685
CAL-27	ATCC	2010-04-08	2.79085
NCI-H1703	ATCC	2008-01-09	2.82998
SCaBER	ATCC	1989-04-01	2.92191
SK-MEL-2	ATCC	2011-01-26	2.98071
HT-29	ATCC	2001-02-21	3.02445
LS513	ATCC	2004-05-12	3.06352
NUGC-3	JCRB	2008-04-22	3.08209
ZR-75-1	ATCC	2001-02-21	3.10692
DLD-1	ATCC	2002-02-27	3.10719
Calu-6	ATCC	1996-05-21	3.1281
NCI-H2023	ATCC	2008-02-13	3.19145
BxPC-3	ATCC	2001-02-21	3.25975
SK-N-AS	ATCC	2002-05-08	3.26563
T84	ATCC	2005-06-15	3.27017
MOLT-3	JCRB	2003-05-21	3.27057
SK-MEL 5	NCI	2001-02-16	3.27157
KMS-21BM	JCRB	2008-10-15	3.27612
RPMI8226	ATCC	2001-07-25	3.28048
SCC-9	ATCC	2010-04-21	3.2889
CCRF-CEM	ATCC	2001-11-30	3.29471
MOLM-13	DSMZ	2006-04-27	3.3062
SK-LU-1	ATCC	2006-08-02	3.30769
NCI-H2110	ATCC	2010-04-21	3.30778
MOLT-4	JCRB	2000-11-22	3.31051
MKN-28	IBL	1990-01-25	3.33031
LP-1	DSMZ	2007-11-15	3.34763
NCI-H292	ATCC	1997-01-21	3.35568
PA-1	ATCC	1989-02-15	3.35792
LS1034	ATCC	2008-03-05	3.36424
22Rv1	ATCC	2001-02-21	3.4106
A549	ATCC	1985-05-01	3.41448
Jurkat, Clone E6-1	ATCC	2003-05-14	3.46996
Calu-1	ATCC	1999-11-25	3.48234
MCF7	ATCC	2002-11-11	3.50322
SW620	ATCC	2001-02-21	3.50565
NCI-H1792	ATCC	2010-02-25	3.5083
U-698-M	DSMZ	2007-11-29	3.51634
NCI-H1437	ATCC	2008-08-20	3.5263
RKO	ATCC	2007-10-17	3.5272
NCI-H446	ATCC	2008-08-20	3.56942
SU-DHL-1	DSMZ	2007-10-11	3.60554
THP-1	ATCC	1994-07-13	3.61367
RT4	ATCC	2007-12-14	3.68567
AN3 CA	ATCC	2006-03-15	3.7537
NCI-H2170	ATCC	2008-02-06	3.76048
MEG-01	JCRB	2003-05-21	3.77483
SW780	ATCC	2008-08-20	3.79509
MC/CAR	ATCC	1998-09-18	3.79634
HCC1954	ATCC	2007-10-17	3.88459
HARA	JCRB	2007-03-28	3.8873
10C9	ATCC	2001-11-30	3.91186
COR-L105	ECACC	2008-08-26	3.91683
NCI-H358	ATCC	2008-09-05	3.91843
SNU-16	ATCC	2000-01-12	3.92393
HARA-B	JCRB	2007-03-28	3.95981
SUM-44PE	Asterand	2010-01-26	3.99171
NCI-H1793	ATCC	2008-02-06	4.00332
SW1417	ATCC	2008-08-06	4.03334
A-498	ATCC	1995-10-16	4.03726
NCI-H23	ATCC	2001-02-21	4.07778
TF-1a	ATCC	2006-05-22	4.08826
8305C	DSMZ	2008-04-10	4.10986
LS411N	ATCC	2004-05-12	4.117
K-562	ATCC	2001-11-27	4.13648
Kasumi-1	ATCC	2006-05-22	4.14219
A-431	ATCC	2001-10-10	4.15821
COLO 320DM	ATCC	1990-01-30	4.1665
HCT116	ATCC	1990-04-10	4.19475
HMCB	ATCC	2008-07-18	4.25938
NCI-H2029	ATCC	2008-02-13	4.28115
Detroit 562	ATCC	2007-11-29	4.30134
RD	ATCC	2003-10-07	4.32352
ARH-77	ATCC	1996-05-10	4.33366
U-2 OS	ATCC	2005-09-28	4.35229
KYSE-520	DSMZ	2009-01-28	4.35337
EGI-1	DSMZ	2008-09-11	4.37791
SW 626	ATCC	2007-02-14	4.37921
MDA-MB-231	ATCC	2001-02-21	4.40363
RMG-I	JCRB	2007-11-07	4.42824
HuH28	JCRB	2008-07-23	4.43014
U266B1	ATCC	1999-10-06	4.45207
NCI-H2009	ATCC	2005-06-08	4.47045
HEC-151	JCRB	2006-07-26	4.49392
MKN-45	IBL	1990-01-25	4.50698
LoVo	ATCC	1990-04-10	4.57455
NCI-H146	ATCC	2000-08-22	4.58287
SK-BR-3	ATCC	1994-08-03	4.58737
SCC-25	ATCC	2008-02-06	4.65167
NCI-H1944	ATCC	2010-02-25	4.66201
ABC-1	JCRB	2008-04-22	4.66891
UM-UC-3	ATCC	2007-08-10	4.68898
MCF10DCIS.com	Asterand	2007-12-04	4.72661
C-33A	ATCC	1989-01-01	4.73856
SK-MEL-28	ATCC	2010-12-14	4.79596
LS 174T	ATCC	2001-07-18	4.79654
HEL	JCRB	2000-11-22	4.83946
U-118 MG	ATCC	2007-11-29	4.86364
Saos-2	ATCC	2010-05-27	4.86683
COLO824	DSMZ	2007-11-29	4.90852
CAMA-1	ATCC	2001-07-25	4.94548
NCI-H716	ATCC	2007-05-23	4.98696
PC-13	IBL	1992-12-08	5.00548
SKM-1	DSMZ	2006-04-27	5.09668
HuP-T4	DSMZ	2008-09-11	5.13281
HT-1197	ATCC	1989-06-01	5.14989
MIA PaCa-2	ATCC	2001-02-21	5.18165
NCI-H661	ATCC	2008-02-06	5.19191
HCC1500	ATCC	2010-03-16	5.23744
HCC-366	DSMZ	2008-04-10	5.27002
HDLM-2	DSMZ	2008-10-23	5.2751
HCC1599	ATCC	2014-12-02	5.3228
NCI-H2122	ATCC	2008-07-23	5.38258
Hs 578T	ATCC	1994-08-03	5.39516
KELLY	DSMZ	2008-06-02	5.40488
SH-SY5Y	DSMZ	2008-10-23	5.4164
YAPC	DSMZ	2007-11-15	5.48538
SK-MEL-30	DSMZ	2008-10-23	5.4967
786-O	ATCC	2004-03-10	5.53398
COLO 201	ATCC	1987-06-22	5.53795
KMM-1	JCRB	2008-10-26	5.55648
NCI-H748	ATCC	2009-05-26	5.60075
SK-MEL-1	ATCC	2008-08-20	5.64341
OE19	ECACC	2008-07-29	5.67585
Capan-1	ATCC	1996-04-21	5.77215
HeLa S3	ATCC	2006-02-22	6.03706
NCI-H460	ATCC	2001-02-21	6.05328
CFPAC-1	ATCC	2008-01-16	6.10917
HCC38	ATCC	2007-11-14	6.19562
NCI-H2030	ATCC	2008-02-13	6.21724
F-36P	DSMZ	2006-04-27	6.23472
HCC1143	ATCC	2007-11-14	6.47745
KMS-12-BM	DSMZ	2007-11-27	6.4916
QG-56	IBL	1992-01-28	6.51365
MDA-MB-468	ATCC	2001-02-21	6.5218
MFE-296	ECACC	2010-02-05	6.53218
NCI-H1650	ATCC	2007-04-03	6.59895
MDA-MB-361	ATCC	1994-11-16	6.61263
COLO 205	ATCC	1990-01-30	6.63084
NCI-H69	ATCC	2000-08-22	6.69033
SK-MES-1	ATCC	1997-02-17	6.72669
U-87 MG	ATCC	2005-04-27	6.74426
Caki-2	ATCC	2004-03-10	6.77682
NCI-H1838	ATCC	2007-11-13	6.98608
Calu-3	ATCC	1996-05-21	7.16103
HEC-50B	JCRB	2011-02-18	7.17627
SK-OV-3	ATCC	2004-09-15	7.22687
LNCaP Clone FGC	ATCC	2000-03-13	7.23213
A-172	ATCC	2008-02-06	7.23416
A2058	JCRB	2011-09-14	7.36148
MG-63	ATCC	2007-11-14	7.41083
DU-4475	ATCC	1990-04-26	7.46605
NCI-H441	ATCC	1997-02-17	7.48338
SNU-5	ATCC	2000-01-12	7.52445
MKN-1	IBL	1991-03-05	7.58636
HPAF-II	ATCC	2001-02-21	7.6535
Hs 766T	ATCC	1998-01-22	7.7075
AGS	ATCC	2004-08-18	7.75285
ME-180	ATCC	1989-07-31	7.76897
NCI-H187	ATCC	2014-12-02	7.80135
NCI-H838	ATCC	2008-02-06	7.8027
SW480	ATCC	2001-02-21	7.95931
BFTC-905	DSMZ	2008-04-10	7.96458
NCI-H1975	ATCC	2007-04-03	7.97689
WERI-Rb-1	ATCC	2008-05-21	8.01304
HCC1569	ATCC	2009-04-01	8.01902
NCI-H1993	ATCC	2008-02-06	8.16737
PANC-1	ATCC	1996-04-22	8.39905
AsPC-1	ATCC	1993-07-14	8.40143
ACHN	ATCC	1992-01-14	8.45077
NCI-H596	ATCC	1999-11-25	8.59356
NCI-H1395	ATCC	2010-04-13	8.66686
HCC1806	ATCC	2010-09-10	8.92856
MDA-MB-157	ATCC	1994-11-16	8.96806
A-204	ATCC	2002-05-08	9.04877
NCI-H520	ATCC	1997-01-21	9.23645
HCC1395	ATCC	2007-12-12	9.34291
T-47D	ATCC	1999-01-13	9.36269
NIH:OVCAR-3	ATCC	2006-01-25	9.45854
NCI-H2347	ATCC	2008-02-13	9.72647
PLC/PRF/5	JCRB	2004-05-19	9.8085
PC-10	IBL	1992-01-28	9.86593
BT-20	ATCC	2007-10-17	> 10
HCC1937	ATCC	2007-10-17	> 10
MDA-MB-134VI	ATCC	2009-07-15	> 10
BT-474	ATCC	2001-02-21	> 10
BT-483	ATCC	2008-04-10	> 10
MDA-MB-453	ATCC	2008-06-04	> 10
HCT-8	ATCC	2006-01-25	> 10
SW837	ATCC	2001-02-21	> 10
DMS 114	ATCC	2002-08-21	> 10
NCI-H345	ATCC	2014-12-02	> 10
PC-3	ATCC	2000-10-24	> 10
HEC-1-A	ATCC	2006-03-08	> 10
HEC-1-B	ATCC	2009-11-05	> 10
SCC15	ATCC	2007-12-21	> 10
C32	ATCC	2001-06-19	> 10
U-138 MG	ATCC	2008-10-15	> 10
NCI-H28	ATCC	2006-02-22	> 10
MFM-223	DSMZ	2007-12-14	> 10
MFE-280	DSMZ	2007-11-15	> 10
COLO-704	DSMZ	2008-08-18	> 10
EFO-21	DSMZ	2008-10-23	> 10
U-2197	DSMZ	2008-10-23	> 10
HEC-108	JCRB	2010-10-18	> 10
MCAS	JCRB	2007-08-31	> 10
MKN-74	IBL	1991-03-05	> 10
